# Supplementary material
Source: Royal Society of Chemistry journal article supplement (doi:10.1039/d6mh00672h)
Supplement: d6mh00672h1.pdf [file d6mh00672h1.pdf]

Supporting Information

**Shaping topological structures and intrinsic properties of  
aramid nanofiber films through fluid flow templating**

Mei-Yan Pu, Niu Jiang, Yu-Yang Song, Yuan-Qi Ma, Shuang-Zhu Li, Jie Yang\*, and  
Wei Yang\*

*College of Polymer Science and Engineering,*

*State Key Laboratory of Advanced Polymer Materials (Sichuan University),*

*Sichuan University,*

*Chengdu 610065, China*

\*Corresponding authors: [psejieyang@scu.edu.cn](mailto:psejieyang@scu.edu.cn) (J. Yang); [weiyang@scu.edu.cn](mailto:weiyang@scu.edu.cn) (W. Yang)

## Supplementary Figures

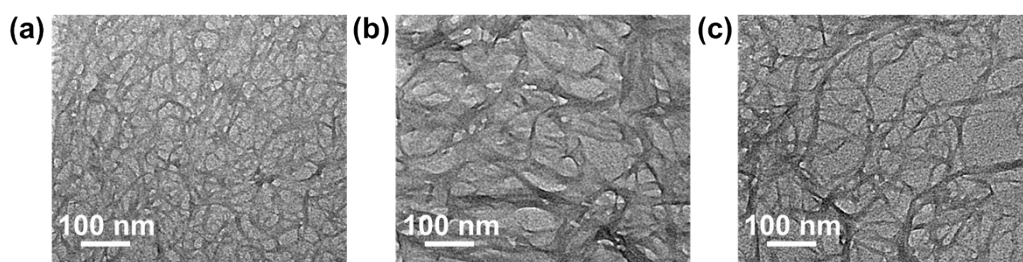

**Fig. S1.** TEM images of the microscopic rigid rod-like chain of (a) ANF-1000, (b) ANF-5000, and (c) ANF-20000 structural units.

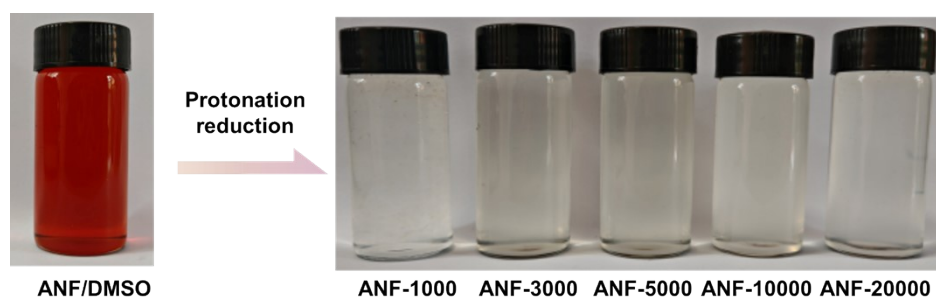

**Fig. S2.** Optical photographs showing the color change of ANF in deionized water before and after reprotonation.

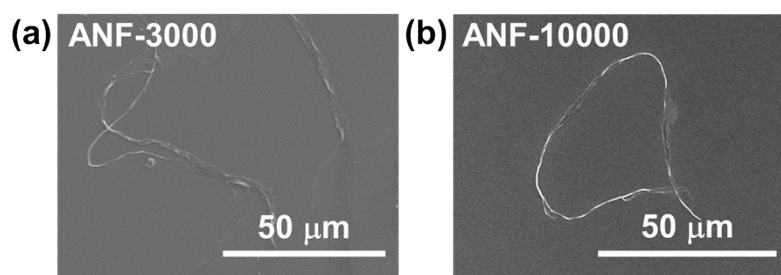

**Fig. S3.** SEM images showing the micrographs of the ANF-3000 and ANF-10000 structural units.

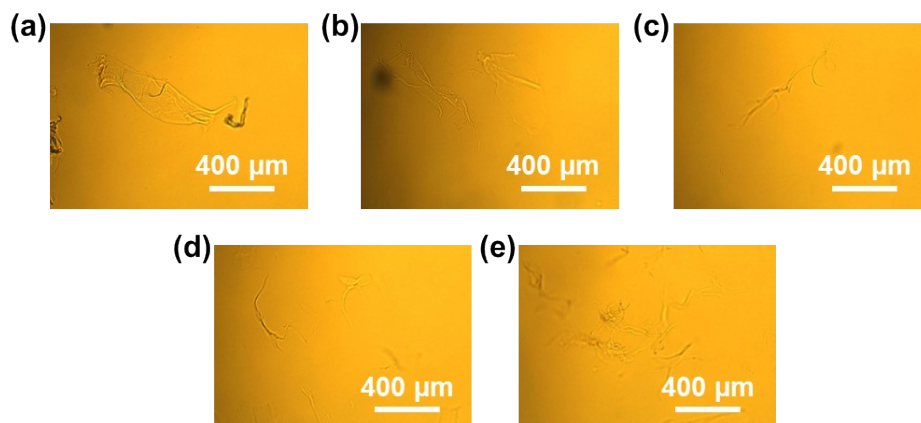

**Fig. S4.** POM images of the nano self-assembly structure of (a) ANF-1000, (b) ANF-3000, (c) ANF-5000, (d) ANF-10000, and (e) ANF-20000.

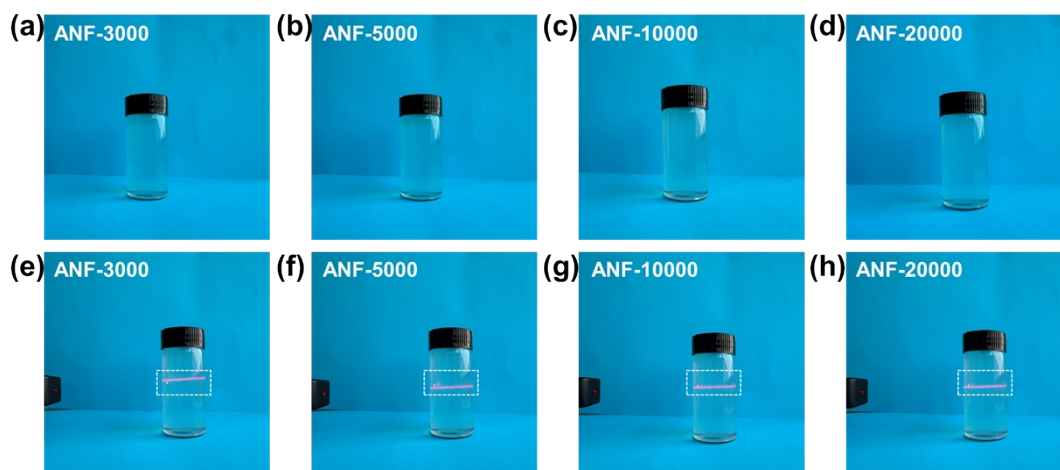

**Fig. S5.** Optical photographs presenting (a-d) stable colloids and (e-h) Tyndall effect of ANF-3000, ANF-5000, ANF-10000, and ANF-20000.

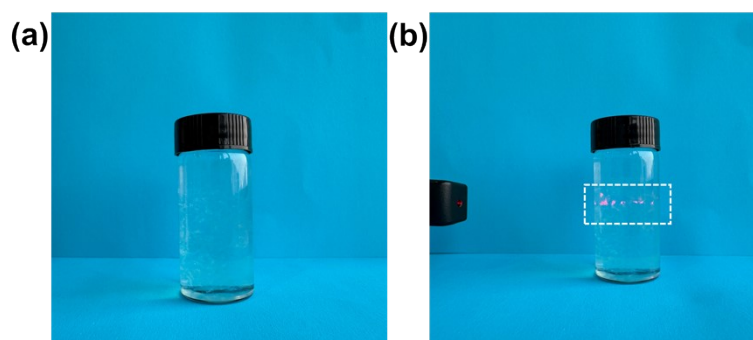

**Fig. S6.** Optical photographs showing (a) nonuniformly dispersed ANF-1000 and (b) ANF-1000 irradiated by a laser.

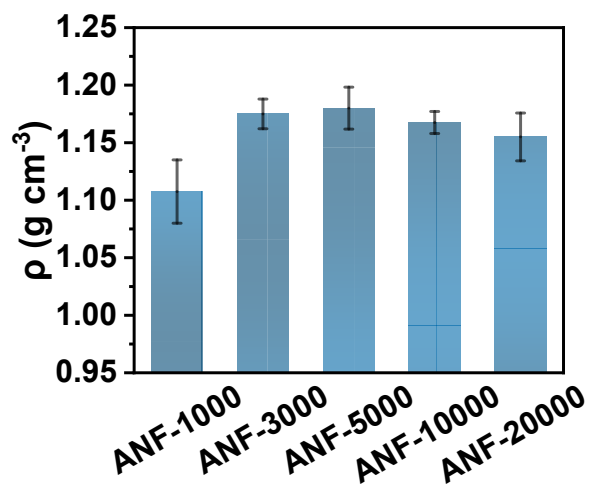

Fig. S7. Density of the ANF films.

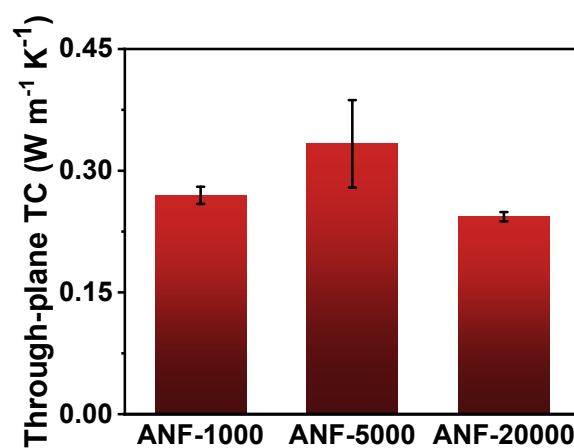

Fig. S8. Through-plane thermal conductivity of ANF-1000, ANF-5000 and ANF-20000.

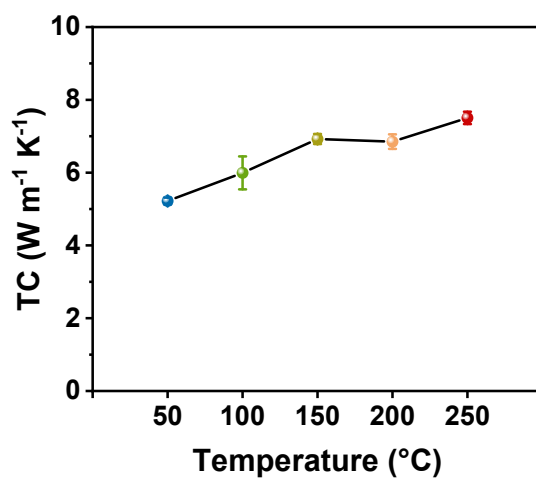

Fig. S9. In-plane thermal conductivity of the ANF-5000 film as a function of temperature.

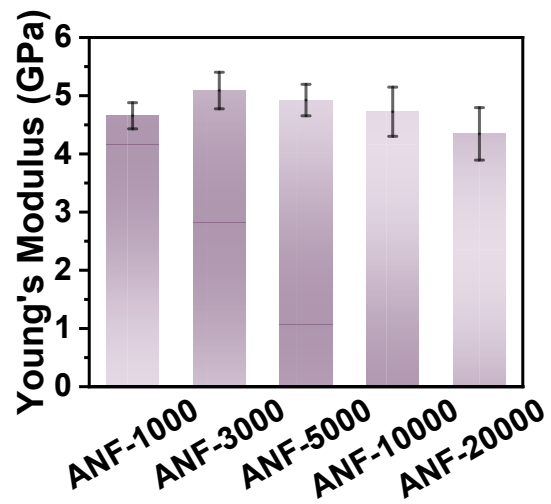

**Fig. S10.** Young's modulus of the ANF films.

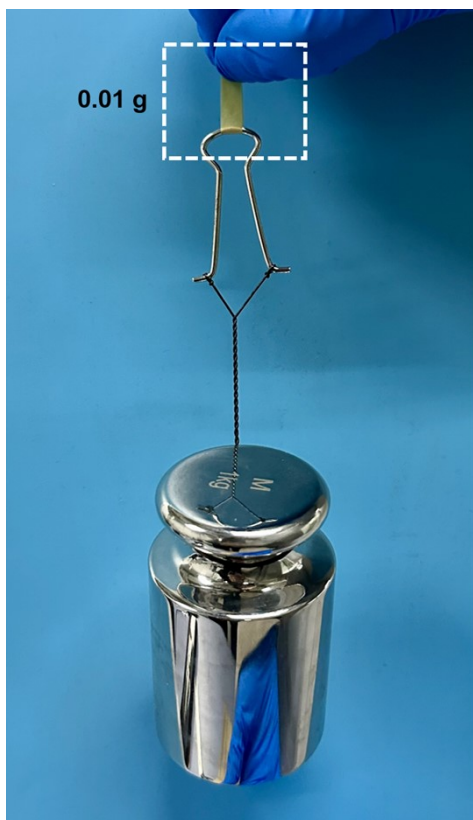

**Fig. S11.** Optical image showing ANF-5000 supporting a load of 1 kg.

## Supplementary Tables

**Table S1** Standard deviation of the surface elastic modulus of the ANF films.

|                             | ANF-1000 | ANF-3000 | ANF-5000 | ANF-10000 | ANF-20000 |
|-----------------------------|----------|----------|----------|-----------|-----------|
| Standard deviation<br>(GPa) | 0.3      | 2.4      | 2.5      | 2.5       | 3.1       |

**Table S2** Decomposition temperatures of the ANF films.

|                   | ANF-1000 | ANF-3000 | ANF-5000 | ANF-10000 | ANF-20000 |
|-------------------|----------|----------|----------|-----------|-----------|
| $T_0$<br>(°C)     | 450.7    | 453.8    | 451.3    | 457.8     | 448.3     |
| $T_{max}$<br>(°C) | 539.8    | 547.0    | 542.5    | 545.3     | 545.2     |

**Table S3** Comparison of thermal conductivity and mechanical properties between pure ANF films reported in literatures and developed in this work.

| Reference           | Thermal conductivity<br>(W m <sup>-1</sup> K <sup>-1</sup> ) | Tensile strength<br>(MPa) | Elongation at break<br>(%) |
|---------------------|--------------------------------------------------------------|---------------------------|----------------------------|
| 2025 <sup>S1</sup>  | 5.16                                                         | \                         | \                          |
| 2025 <sup>S2</sup>  | 4.79                                                         | \                         | \                          |
| 2025 <sup>S3</sup>  | 5.05                                                         | 181.4                     | 9.1                        |
| 2025 <sup>S4</sup>  | 1.512                                                        | ~220                      | ~7                         |
| 2024 <sup>S5</sup>  | 1.07                                                         | 143.6                     | ~11.5                      |
| 2023 <sup>S6</sup>  | ~2.4                                                         | 154                       | 4                          |
| 2023 <sup>S7</sup>  | 2.27                                                         | ~225                      | ~13                        |
| 2022 <sup>S8</sup>  | 2.45                                                         | ~175                      | ~8                         |
| 2022 <sup>S9</sup>  | 1.33                                                         | 137.6                     | ~12                        |
| 2020 <sup>S10</sup> | \                                                            | 180                       | ~5.5                       |
| 2024 <sup>S11</sup> | ~4.5                                                         | 137                       | 11.9                       |
| 2024 <sup>S12</sup> | 1.8                                                          | 56.1                      | 4.15                       |
| 2021 <sup>S13</sup> | ~1.55                                                        | ~175                      | ~5.3                       |
| 2023 <sup>S14</sup> | 2.25                                                         | 74                        | 4.6                        |
| <b>This work</b>    | <b>5.49</b>                                                  | <b>208.8</b>              | <b>15.9</b>                |

## References

- S1 Y.-Y. Song, N. Jiang, S.-Z. Li, L.-N. Wang, L. Bai, J. Yang and W. Yang, *Mater. Horiz.*, 2025, **12**, 4260-4273.
- S2 X. Li, B. Wu, Y. Lv, R. Xia and J. Qian, *Chem. Eng. J.*, 2025, **503**, 158246.
- S3 N. Jiang, Y.-Y. Song, L.-N. Wang, W.-W. Liu, L. Bai, J. Yang and W. Yang, *Adv. Funct. Mater.*, 2025, **35**, 2416277.
- S4 H. Xiao, L. Si, Y. Li, X. Liang, J. Song and S. Shen, *Adv. Funct. Mater.*, 2025, 10.1002/adfm.202508737.
- S5 Y. Han, K. Ruan, X. He, Y. Tang, H. Guo, Y. Guo, H. Qiu and J. Gu, *Angew. Chem. Int. Ed.*, 2024, **63**, e202401538.
- S6 D. K. Nguyen, T. T. H. Tran, T. K. L. Mai, M.-S. Tran, S. Ghotekar, A. L. H. Pham, V.-C. Nguyen and M. C. Vu, *ACS Appl. Nano Mater.*, 2023, **7**, 2724-2734.
- S7 J. Ren, G. Jiang, Z. Wang, Q. Qing, F. Teng, Z. Jia, G. Wu and S. Jia, *Adv. Compos. Hybrid Mater.*, 2023, **7**, 5.
- S8 L.-H. Zhao, L. Wang, Y.-F. Jin, J.-W. Ren, Z. Wang and L.-C. Jia, *Composites, Part B*, 2022, **229**, 109454.
- S9 Z.-G. Wang, Y.-F. Jin, R. Hong, J. Du, K. Dai, G.-Q. Zhang, J. Gao, L. Xu, J.-Z. Xu and Z.-M. Li, *Composites, Part B*, 2022, **242**, 110084.
- S10 K. Wu, J. Wang, D. Liu, C. Lei, D. Liu, W. Lei and Q. Fu, *Adv. Mater.*, 2020, **32**, 1906939.
- S11 Y. Wei, X. Chen, Z. Dai, M. Cheng, Q. Fu and H. Deng, *Compos. Sci. Technol.*, 2024, **248**, 110480.
- S12 W. Luo, B. Wei, T. Luo, B. Li and G. Zhu, *Small*, 2024, **20**, 2406574.
- S13 C. Xu, C. Wei, Q. Li, Z. Li, Z. Zhang and J. Ren, *Nanomaterials*, 2021, **11**, 2544.
- S14 M. Yan, X. Chen, Y. Xu, Y. Pan, J. Li, J. Li, T. Wu, H. Zheng, X. Chen and J. He, *Compos. Commun.*, 2023, **37**, 101428.
